# Supplementary material for: Arsenite Effects on Mitochondrial Bioenergetics in Human and Mouse Primary Hepatocytes Follow a Nonlinear Dose Response
Source: Hindawi journal article supplement (doi:10.1155/2017/9251303), 2017-01-01

SUPPLEMENTARY FIGURE 1. Arsenite effect on ATP levels in primary hepatocytes

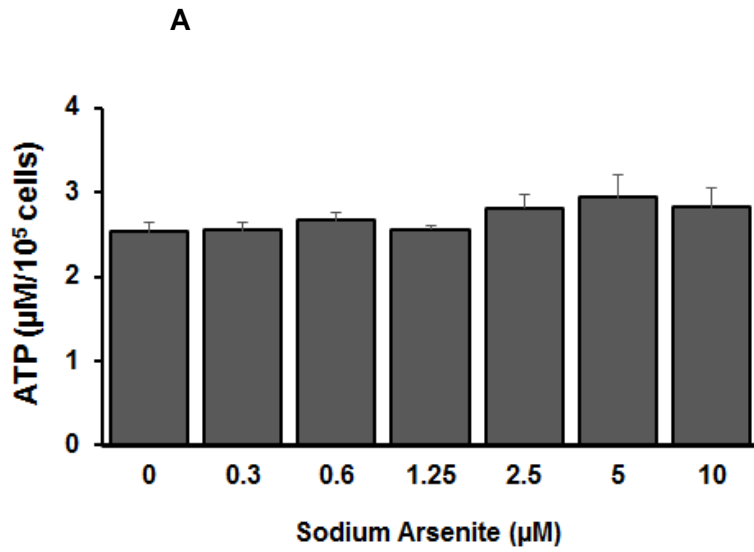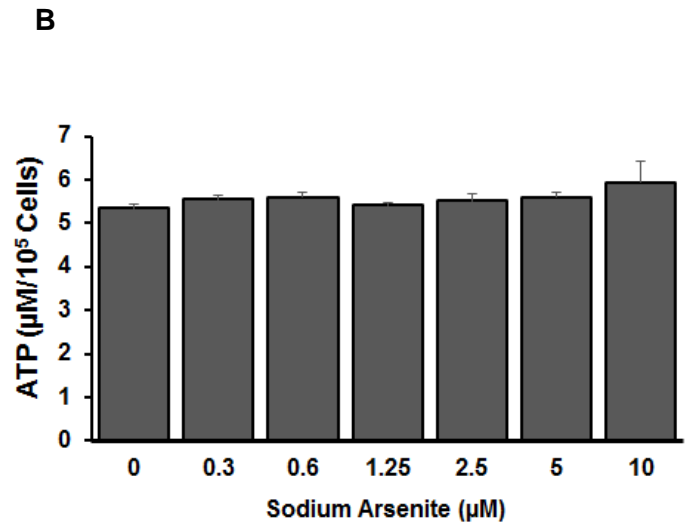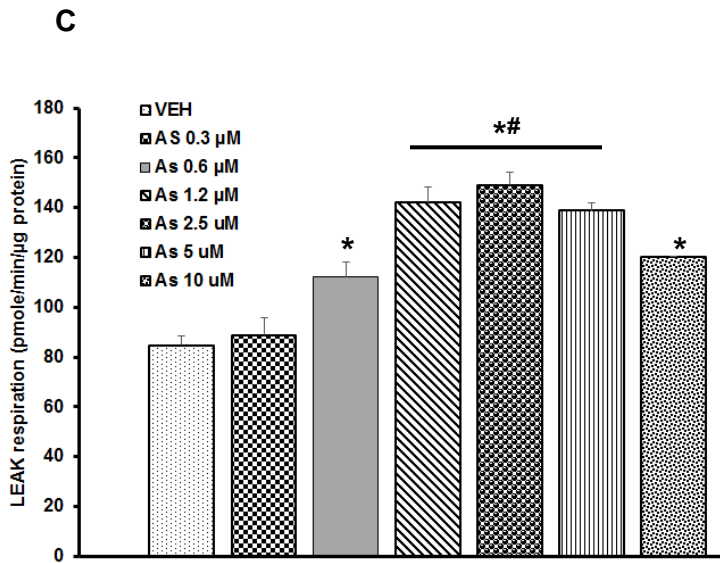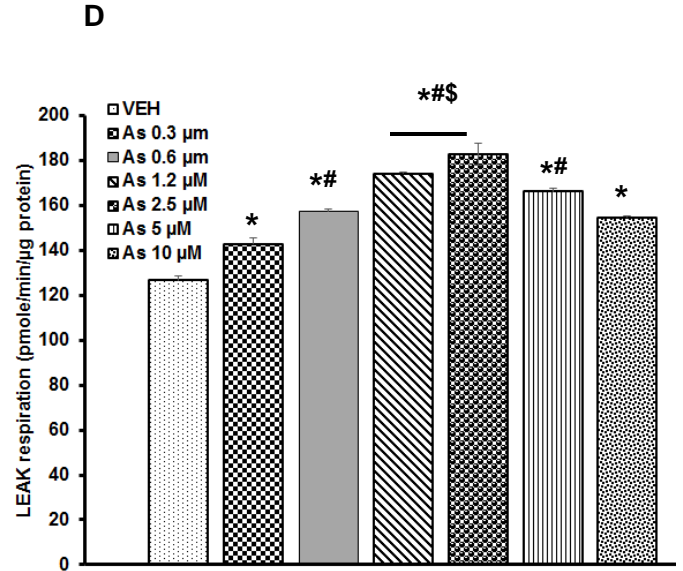

Supplement: f1 [file 9251303.f1.pdf]
